# Supplementary material for: Cosmetic outcome as rated by patients, doctors, nurses and BCCT.core software assessed over 5 years in a subset of patients in the TARGIT-A Trial
Source: Springer Nature journal article supplement (doi:10.1186/s13014-018-0998-x), 2018-04-13
Supplement: MOESM1 [file 15633554]

## Additional File 1: Supplementary Tables

**Table S1: Description of Harris Scale\* Scoring System**

| Score             | Description                                                                                                                                                                              |
|-------------------|------------------------------------------------------------------------------------------------------------------------------------------------------------------------------------------|
| <b>Excellent:</b> | Perfect symmetry, no visible distortion or skin changes<br><i>(Treated breast appears almost identical to the untreated breast)</i>                                                      |
| <b>Good:</b>      | Slight skin distortion, retraction or oedema; mild telangiectasia, mild hyperpigmentation, or an absent nipple-areolar complex<br><i>(Minimal difference between the two breasts)</i>    |
| <b>Fair:</b>      | Moderate distortion of nipple or breast symmetry, moderate hyperpigmentation, prominent skin retraction, oedema or telangiectasia<br><i>(Obvious difference between the two breasts)</i> |
| <b>Poor:</b>      | Marked distortion, oedema or fibrosis, or severe hyperpigmentation<br><i>(Marked changes in the treated breast)</i>                                                                      |

**\*Also known as the Harvard Scale**

**Table S2: Cosmesis Compliance Tables by Time Point**

| Time    | Treatment Group | Patients |     |                             | Nurses |     |                             | Doctors |     |                             | BCCT.core |     |                             |
|---------|-----------------|----------|-----|-----------------------------|--------|-----|-----------------------------|---------|-----|-----------------------------|-----------|-----|-----------------------------|
|         |                 | n        | %   | Chi <sup>2</sup><br>(exact) | n      | %   | Chi <sup>2</sup><br>(exact) | n       | %   | Chi <sup>2</sup><br>(exact) | n         | %   | Chi <sup>2</sup><br>(exact) |
| BL      | IORT            | 54       | 90% | 0.31                        | 59     | 98% | 0.62                        | 52      | 87% | 0.05                        | 53        | 88% | 1.00                        |
|         | EBRT            | 55       | 83% |                             | 63     | 95% |                             | 64      | 97% |                             | 58        | 88% |                             |
|         | Total           | 109      | 87% |                             | 122    | 97% |                             | 116     | 92% |                             | 111       | 88% |                             |
| 1Yr     | IORT            | 50       | 83% | 0.44                        | 58     | 97% | 0.17                        | 52      | 87% | 0.48                        | 52        | 87% | 0.80                        |
|         | EBRT            | 59       | 89% |                             | 59     | 89% |                             | 54      | 82% |                             | 56        | 85% |                             |
|         | Total           | 109      | 87% |                             | 117    | 93% |                             | 106     | 84% |                             | 108       | 86% |                             |
| 2Yr     | IORT            | 48       | 80% | 0.64                        | 54     | 90% | 0.43                        | 54      | 90% | 1.00                        | 44        | 73% | 0.84                        |
|         | EBRT            | 55       | 85% |                             | 55     | 85% |                             | 58      | 89% |                             | 46        | 71% |                             |
|         | Total           | 103      | 82% |                             | 109    | 87% |                             | 112     | 90% |                             | 90        | 72% |                             |
| 3Yr     | IORT            | 39       | 68% | 0.14                        | 49     | 86% | 1.00                        | 44      | 77% | 0.82                        | 24        | 42% | 0.71                        |
|         | EBRT            | 48       | 81% |                             | 51     | 86% |                             | 47      | 80% |                             | 27        | 46% |                             |
|         | Total           | 87       | 75% |                             | 100    | 86% |                             | 91      | 78% |                             | 51        | 44% |                             |
| 4Yr     | IORT            | 39       | 70% | 0.29                        | 46     | 82% | 0.64                        | 49      | 88% | 0.60                        | 14        | 25% | 0.83                        |
|         | EBRT            | 45       | 79% |                             | 44     | 77% |                             | 47      | 82% |                             | 16        | 28% |                             |
|         | Total           | 84       | 74% |                             | 90     | 80% |                             | 96      | 85% |                             | 30        | 27% |                             |
| 5Yr     | IORT            | 30       | 57% | 0.23                        | 33     | 62% | 0.56                        | 42      | 79% | 0.38                        |           | N/A |                             |
|         | EBRT            | 38       | 69% |                             | 31     | 56% |                             | 39      | 71% |                             |           | N/A |                             |
|         | Total           | 68       | 63% |                             | 60     | 56% |                             | 81      | 75% |                             |           | N/A |                             |
| Overall | IORT            | 260      | 75% | 0.05                        | 299    | 86% | 0.15                        | 293     | 85% | 0.84                        | 187       | 64% | 0.80                        |
|         | EBRT            | 300      | 82% |                             | 303    | 82% |                             | 309     | 84% |                             | 203       | 65% |                             |
|         | Total           | 560      | 78% |                             | 598    | 84% |                             | 602     | 84% |                             | 390       | 64% |                             |

Abbreviations: BL = Baseline; IORT =TARGIT Intraoperative Radiotherapy group; EBRT = External Beam Radiotherapy group

**Table S3: Generalized Estimating Equation Model Estimates, controlled for age, tumour size, tumour grade and BMI**

| Rater               | Doctor     |            |               | Nurse       |            |                |
|---------------------|------------|------------|---------------|-------------|------------|----------------|
|                     | Estimate   | SE         | p             | Estimate    | SE         | p              |
| <b>Time Overall</b> | -          | -          | <b>0.018*</b> | -           | -          | <b>0.004**</b> |
| Year 1†             | -2.1       | 0.7        | 0.003**       | -1.4        | 0.5        | 0.006**        |
| Year 2†             | -1.3       | 0.7        | 0.049*        | -1.4        | 0.5        | 0.003**        |
| Year 3†             | -1.5       | 0.6        | 0.013*        | -1.4        | 0.6        | 0.009**        |
| Year 4†             | -0.7       | 0.7        | 0.304         | -0.3        | 0.6        | 0.653          |
| Year 5†             | -1.6       | 0.7        | 0.018*        | -0.9        | 0.6        | 0.112          |
| BMI                 | -0.8       | 0.3        | 0.009**       | -0.2        | 0.2        | 0.336          |
| <b>Treatment</b>    | <b>0.7</b> | <b>0.5</b> | <b>0.207</b>  | <b>-0.6</b> | <b>0.3</b> | <b>0.083</b>   |

SE: Standard error BMI: Body Mass Index

† Compared to baseline result \*significant at the 0.05 level \*\* significant at the 0.01 level

Bolded entries indicate overall GEE model p-values (Type III tests of fixed effects). Note that age, tumour size and tumour grade did not influence cosmetic result - estimates and p-values not shown

**Table S4: Un-dichotomised Harris Scale Data**

| Time     | Score     | Patients |      | Nurses |      | Doctors |      | BCCT.core |      |
|----------|-----------|----------|------|--------|------|---------|------|-----------|------|
|          |           | IORT     | EBRT | IORT   | EBRT | IORT    | EBRT | IORT      | EBRT |
| Baseline | Excellent | 18%      | 27%  | 29%    | 46%  | 48%     | 55%  | 23%       | 24%  |
|          | Good      | 67%      | 55%  | 64%    | 46%  | 38%     | 45%  | 60%       | 66%  |
|          | Fair      | 13%      | 18%  | 5%     | 8%   | 14%     | 0%   | 17%       | 10%  |
|          | Poor      | 2%       | 0%   | 2%     | 0%   | 0%      | 0%   | 0%        | 0%   |
| 1Yr      | Excellent | 14%      | 17%  | 28%    | 24%  | 35%     | 32%  | 14%       | 5%   |
|          | Good      | 60%      | 61%  | 52%    | 52%  | 50%     | 48%  | 61%       | 55%  |
|          | Fair      | 24%      | 22%  | 21%    | 24%  | 15%     | 18%  | 25%       | 34%  |
|          | Poor      | 2%       | 0%   | 0%     | 0%   | 0%      | 2%   | 0%        | 5%   |
| 2Yr      | Excellent | 19%      | 24%  | 24%    | 27%  | 26%     | 31%  | 30%       | 15%  |
|          | Good      | 60%      | 56%  | 65%    | 42%  | 59%     | 59%  | 50%       | 59%  |
|          | Fair      | 19%      | 16%  | 11%    | 31%  | 15%     | 9%   | 20%       | 22%  |
|          | Poor      | 2%       | 4%   | 0%     | 0%   | 0%      | 2%   | 0%        | 4%   |
| 3Yr      | Excellent | 13%      | 23%  | 26%    | 31%  | 27%     | 19%  | 42%       | 22%  |
|          | Good      | 77%      | 54%  | 55%    | 43%  | 54%     | 72%  | 46%       | 52%  |
|          | Fair      | 10%      | 17%  | 18%    | 26%  | 18%     | 9%   | 12%       | 22%  |
|          | Poor      | 0%       | 6%   | 0%     | 0%   | 0%      | 0%   | 0%        | 4%   |
| 4Yr      | Excellent | 26%      | 18%  | 54%    | 46%  | 12%     | 26%  | 36%       | 25%  |
|          | Good      | 64%      | 60%  | 41%    | 39%  | 80%     | 62%  | 50%       | 44%  |
|          | Fair      | 10%      | 20%  | 4%     | 16%  | 6%      | 13%  | 14%       | 31%  |
|          | Poor      | 0%       | 2%   | 0%     | 0%   | 2%      | 0%   | 0%        | 0%   |
| 5Yr      | Excellent | 13%      | 26%  | 54%    | 42%  | 19%     | 20%  | N/A       | N/A  |
|          | Good      | 77%      | 42%  | 33%    | 36%  | 69%     | 59%  | N/A       | N/A  |
|          | Fair      | 7%       | 32%  | 12%    | 19%  | 10%     | 18%  | N/A       | N/A  |
|          | Poor      | 3%       | 0%   | 0%     | 3%   | 2%      | 3%   | N/A       | N/A  |
